# Supplementary material
Source: Springer Nature journal article supplement (https://www.springermedizin.de/resource/supplementary/13223_2011_308_MOESM2_ESM.pdf/9597526)

Hypersensitivity Scores

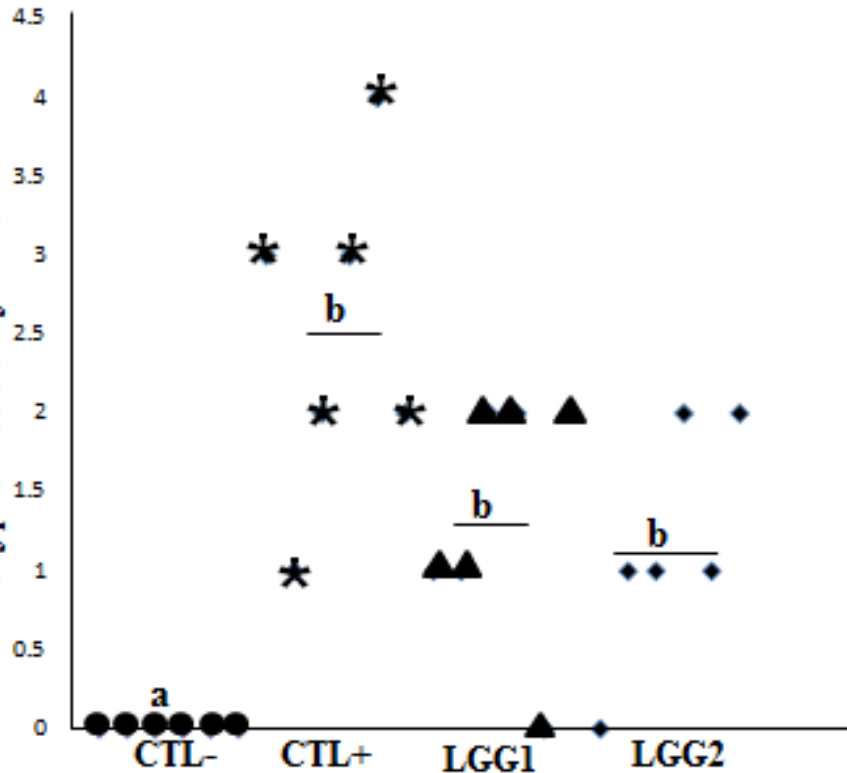

- CTL-
- \* CTL+
- ▲ LGG1
- ◆ LGG2

Supplement: MOESM2 [file 9597526]
